# Supplementary material for: Simulated bacterial infection disrupts the circadian fluctuation of immune cells in wrinkle-lipped bats (Chaerephon plicatus)
Source: PeerJ. 2017 Aug 3;5:e3570. doi: 10.7717/peerj.3570 (PMC5545106; doi:10.7717/peerj.3570)
Supplement: Data S1 — Raw hematological data of Chaerephon plicatus according to treatment (PBS or control) before (A) and after (B). [file peerj-05-3570-s001.xlsx]

## Sheet: Tabelle1
Raw hematological data									A Samples						B Samples						DELTA VALUES
Sample	sex	treatment	date	time a	time b	delta time	bodymass a	bodymass b	leukocyte a	lymphocyte a	neutrophil a	basophil a	eosinophil a	monocyte a	leukocyte b	lymphocyte b	neutrophil b	basophil b	eosinophil b	monocyte b	delta leukocyte	delta lymphocyte	delta neutrophil	delta basophil	delta eosinophil	delta monocyte
2	female	LPS	2015-11-20	08:52:00	19:10:00	10.3	16.5	16	8600	3526	2924	86	2064	0	9480	663.6	8058	0	663.6	94.8	880	-2862.4	5134	-86	-1400.4	94.8
16	female	LPS	2015-11-20	10:53:00	20:16:00	9.38333	17	17	4450	1468.5	2314	0	400.5	267	2670	400.5	2055.9	0	186.9	26.7	-1780	-1068	-258.1	0	-213.6	-240.3
21	female	LPS	2015-11-22	09:02:00	19:36:00	10.5667	19	17	4700	1974	1833	0	846	47	11700	1053	10179	0	468	0	7000	-921	8346	0	-378	-47
23	female	LPS	2015-11-22	09:16:00	19:48:00	10.5333	16	14.5	8650	3546.5	3373.5	0	1557	173	7950	1590	5326.5	0	1033.5	0	-700	-1956.5	1953	0	-523.5	-173
25	female	LPS	2015-11-22	09:50:00	19:58:00	10.1333	17	18	6450	2257.5	2773.5	0	645	774	8200	1066	6970	0	164	0	1750	-1191.5	4196.5	0	-481	-774
27	female	LPS	2015-11-22	10:20:00	20:08:00	9.8	18	16	7300	2117	5037	0	146	0	10700	1605	8667	0	428	0	3400	-512	3630	0	282	0
33	female	LPS	2015-11-22	10:40:00	20:35:00	9.91667	18	15.5	6700	1675	3886	0	1139	0	1950	780	1131	0	39	0	-4750	-895	-2755	0	-1100	0
36	female	LPS	2015-11-24	09:11:00	20:22:00	11.1833	19	18	4350	1957.5	1348.5	43.5	957	43.5	4450	801	3471	0	133.5	44.5	100	-1156.5	2122.5	-43.5	-823.5	1
38	female	LPS	2015-11-24	09:24:00	20:30:00	11.1	17	16	5100	2856	1173	0	867	204	10750	3655	6772.5	0	322.5	0	5650	799	5599.5	0	-544.5	-204
40	female	LPS	2015-11-24	09:41:00	20:44:00	11.05	17	16	6350	1841.5	3746.5	0	571.5	190.5	10200	1326	8058	0	816	0	3850	-515.5	4311.5	0	244.5	-190.5
44	female	LPS	2015-11-24	10:07:00	21:12:00	11.0833	17	16	6700	2211	4020	0	402	67	6150	1537.5	4366.5	0	246	0	-550	-673.5	346.5	0	-156	-67
5	female	PBS	2015-11-20	09:22:00	19:20:00	9.96667	16	15.5	8300	2656	3652	249	1660	83	4032	1572.48	1290.24	0	967.68	201.6	-4268	-1083.52	-2361.76	-249	-692.32	118.6
9	female	PBS	2015-11-20	10:03:00	19:49:00	9.76667	16	15.5	6750	1890	3105	0	1485	270	7400	888	6216	0	296	0	650	-1002	3111	0	-1189	-270
17	female	PBS	2015-11-20	10:59:00	20:24:00	9.41667	16	15.5	9200	1196	7452	0	184	368	4400	572	3784	0	44	0	-4800	-624	-3668	0	-140	-368
18	female	PBS	2015-11-22	08:34:00	19:29:00	10.9167	16	14	9050	4706	2715	0	1538.5	90.5	2000	600	1000	0	400	0	-7050	-4106	-1715	0	-1138.5	-90.5
22	female	PBS	2015-11-22	09:09:00	19:44:00	10.5833	19	16.5	7000	4690	1400	0	630	280	2100	945	882	0	273	0	-4900	-3745	-518	0	-357	-280
24	female	PBS	2015-11-22	09:41:00	19:54:00	10.2167	19	17	12150	6196.5	4131	0	1336.5	486	5200	2444	2600	0	104	52	-6950	-3752.5	-1531	0	-1232.5	-434
26	female	PBS	2015-11-22	09:54:00	20:00:00	10.1	17.5	16	7550	3322	3246.5	0	906	75.5	2050	799.5	1148	0	102.5	0	-5500	-2522.5	-2098.5	0	-803.5	-75.5
28	female	PBS	2015-11-22	10:03:00	20:13:00	10.1667	16.5	14.5	10000	2800	4600	0	2500	100	3150	1228.5	1386	0	535.5	0	-6850	-1571.5	-3214	0	-1964.5	-100
30	female	PBS	2015-11-22	10:23:00	20:29:00	10.1	17	15	4150	1286.5	2656	0	166	41.5	1000	470	460	20	50	0	-3150	-816.5	-2196	20	-116	-41.5
32	female	PBS	2015-11-22	10:39:00	20:36:00	9.95	16.5	15	8050	1610	3783.5	0	2576	80.5	4950	1485	3069	0	396	0	-3100	-125	-714.5	0	-2180	-80.5
34	female	PBS	2015-11-22	10:46:00	20:41:00	9.91667	17	15.5	5575	2453	2118.5	0	947.75	55.75	2100	840	1092	0	147	21	-3475	-1613	-1026.5	0	-800.75	-34.75
45	female	PBS	2015-11-24	10:07:00	21:12:00	11.0833	18.5	16.5	9650	3763.5	4632	0	1254.5	0	6000	2400	2820	60	720	0	-3650	-1363.5	-1812	60	-534.5	0
4	male	LPS	2015-11-20	09:16:00	19:17:00	10.0167	18	18	11300	7458	3277	113	339	113	10160	2946.4	6299.2	0	304.8	609.6	-1140	-4511.6	3022.2	-113	-34.2	496.6
8	male	LPS	2015-11-20	09:49:00	19:40:00	9.85	19	18	9500	3990	4560	0	950	0	10800	1512	9180	0	108	0	1300	-2478	4620	0	-842	0
10	male	LPS	2015-11-20	10:12:00	19:50:00	9.63333	17	16.5	5400	2268	2268	0	702	162	9500	1995	7505	0	0	0	4100	-273	5237	0	-702	-162
12	male	LPS	2015-11-20	10:30:00	20:05:00	9.58333	18	17.5	2450	759.5	1396.5	73.5	122.5	98	3560	462.8	3026	0	71.2	0	1110	-296.7	1629.5	-73.5	-51.3	-98
14	male	LPS	2015-11-20	10:43:00	20:11:00	9.46667	18	18	11650	4660	5126	0	1514.5	349.5	10630	1488.2	9141.8	0	0	0	-1020	-3171.8	4015.8	0	-1514.5	-349.5
19	male	LPS	2015-11-22	08:44:00	19:32:00	10.8	17.5	15	10000	5800	3400	0	700	100	6700	1876	4623	0	201	0	-3300	-3924	1223	0	-499	-100
29	male	LPS	2015-11-22	10:16:00	20:25:00	10.15	18	16	5950	2439.5	3153.5	0	297.5	59.5	9450	378	8977.5	0	94.5	0	3500	-2061.5	5824	0	-203	-59.5
31	male	LPS	2015-11-22	10:29:00	20:21:00	9.86667	19.5	17.5	5000	1800	2700	0	450	50	5650	1073.5	4237.5	0	339	0	650	-726.5	1537.5	0	-111	-50
42	male	LPS	2015-11-24	09:50:00	20:56:00	11.1	16	16	14600	5694	8030	0	876	0	17500	2275	14350	0	875	0	2900	-3419	6320	0	-1	0
46	male	LPS	2015-11-24	10:18:00	21:20:00	11.0333	17.5	16	7000	2450	4340	0	210	0	10250	3075	7072.5	0	102.5	0	3250	625	2732.5	0	-107.5	0
48	male	LPS	2015-11-24	10:26:00	21:32:00	11.1	17	16	6950	2085	4378.5	0	417	69.5	8550	1624.5	6754.5	0	0	171	1600	-460.5	2376	0	-417	101.5
1	male	PBS	2015-11-20	08:30:00	19:00:00	10.5	13.5	13	6100	3965	2135	0	0	0	3666	1136.46	2346.24	0	146.64	36.66	-2434	-2828.54	211.24	0	146.64	36.66
3	male	PBS	2015-11-20	09:03:00	19:14:00	10.1833	19	18	11250	7762.5	2925	0	450	112.5	4870	2532.4	1899.3	0	97.4	340.9	-6380	-5230.1	-1025.7	0	-352.6	228.4
11	male	PBS	2015-11-20	10:22:00	19:59:00	9.61667	20	19	6200	1550	3844	0	806	0	8900	801	7921	0	178	0	2700	-749	4077	0	-628	0
13	male	PBS	2015-11-20	10:35:00	20:07:00	9.53333	19	19	5450	2452.5	2016.5	0	708.5	272.5	6560	1902.4	3936	0	721.6	0	1110	-550.1	1919.5	0	13.1	-272.5
20	male	PBS	2015-11-22	08:50:00	19:36:00	10.7667	18.5	16.5	8900	5696	2314	0	801	89	3150	1291.5	1732.5	31.5	94.5	0	-5750	-4404.5	-581.5	31.5	-706.5	-89
35	male	PBS	2015-11-24	09:08:00	20:15:00	11.1167	19	18	7800	3744	3744	0	312	0	5850	994.5	4387.5	58.5	351	58.5	-1950	-2749.5	643.5	58.5	39	58.5
37	male	PBS	2015-11-24	09:24:00	20:29:00	11.0833	17.5	17	7250	2900	3117.5	0	942.5	290	2850	1168.5	1339.5	28.5	313.5	0	-4400	-1731.5	-1778	28.5	-629	-290
39	male	PBS	2015-11-24	09:38:00	20:45:00	11.1167	18	17	6300	2898	3024	0	378	0	3200	1344	1600	64	192	0	-3100	-1554	-1424	64	-186	0
47	male	PBS	2015-11-24	10:24:00	21:28:00	11.0667	16.5	16	12100	3025	8591	0	363	121	10700	1498	9095	0	107	0	-1400	-1527	504	0	-256	-121
